# Supplementary material for: Experience-dependent olfactory behaviors of the parasitic nematode Heligmosomoides polygyrus
Source: PubMed Central journal article supplement (PMC5708605; doi:10.1371/journal.ppat.1006709), 2017-11-30

S1 Fig

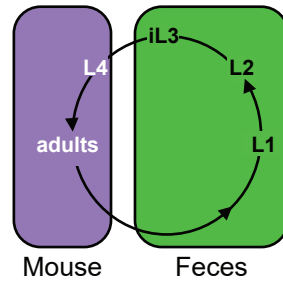

Supplement: ppat.1006709.s001.pdf [file ppat.1006709.s001.pdf]
