# Supplementary material for: Experience-dependent olfactory behaviors of the parasitic nematode Heligmosomoides polygyrus
Source: PubMed Central journal article supplement (PMC5708605; doi:10.1371/journal.ppat.1006709), 2017-11-30
Supplement: ppat.1006709.s004.pdf [file ppat.1006709.s004.pdf]

S4 Fig

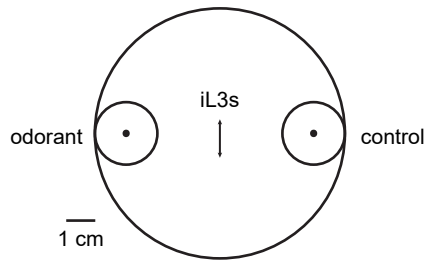

$$\text{chemotaxis index} = \frac{(\# \text{ of iL3s at odorant}) - (\# \text{ of iL3s at control})}{(\# \text{ of iL3s at odorant}) + (\# \text{ of iL3s at control})}$$
